# Supplementary material for: Three-dimensional hierarchical MoS2nanoflake array/carbon cloth as high-performance flexible lithium-ion battery anodes
Source: Royal Society of Chemistry journal article supplement (doi:10.1039/c3ta14744d), 2014-01-01
Supplement: c3ta14744d.pdf [file c3ta14744d.pdf]

## Three-dimensional hierarchical MoS<sub>2</sub> nanoflake arrays/carbon cloth as high-performance flexible lithium-ion battery anodes

Hailong Yu,<sup>‡a</sup> Chunling Zhu,<sup>‡b</sup> Kai Zhang,<sup>a</sup> Yujin Chen,<sup>\*a</sup> Chunyan Li,<sup>a</sup> Peng Gao,<sup>\*b</sup> Piaoping Yang,<sup>\*b</sup> and Qiuyun Ouyang<sup>a</sup>

<sup>a</sup> Key Laboratory of In-Fiber Integrated Optics, Ministry of Education, and College of Science, Harbin Engineering University, Harbin 150001, Heilongjiang, China

<sup>b</sup> College of Materials Science and Chemical Engineering, Harbin Engineering University, Harbin, Heilongjiang, 150001, China.

E-mail: chen yujin@hrbeu.edu.cn, gaopeng@hrbeu.edu.cn, and yangpiaoping@hrbeu.edu.cn

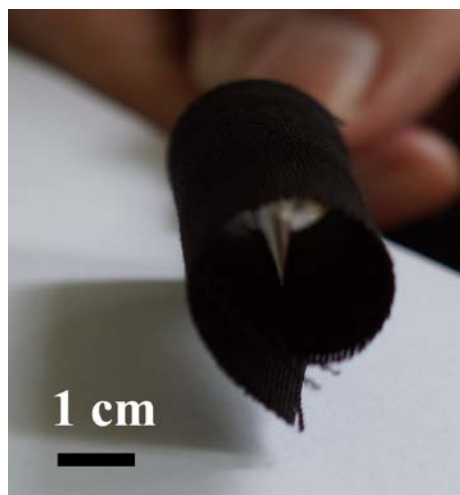

**Figure S1.** Photographic image of the 3D hierarchical MoS<sub>2</sub> nanoflake arrays/carbon cloth exhibited very good flexibility and it can be rolled up periodically with a tweezer.

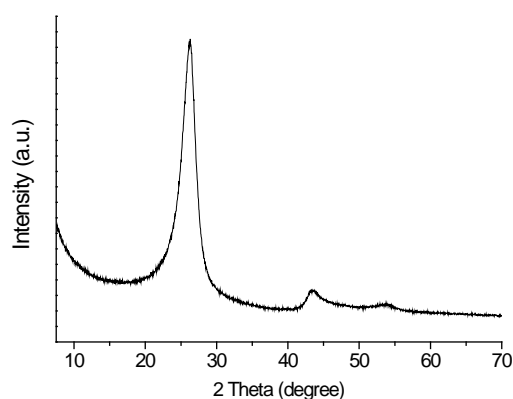

**Figure S2.** XRD pattern of carbon cloth that was hydrothermally treated under the same conditions as CCMS-2 without Mo source.

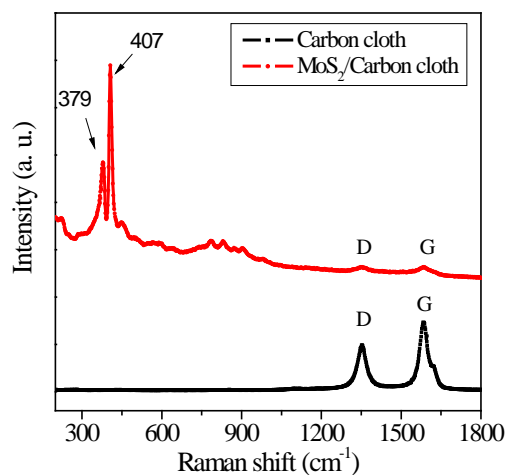

**Figure S3.** Raman spectra of the 3D hierarchical MoS<sub>2</sub> nanoflake arrays/carbon cloth and carbon cloth.

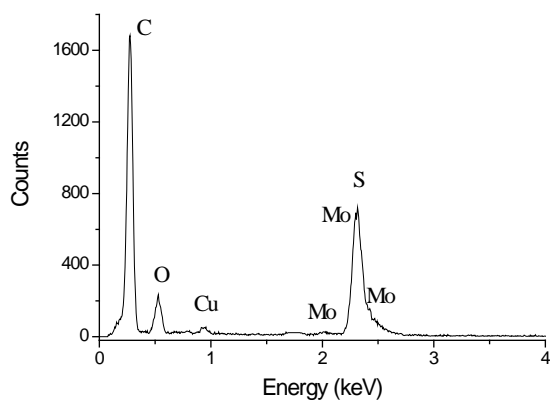

**Figure S4.** EDX pattern of 3D hierarchical MoS<sub>2</sub> nanoflake arrays/carbon cloth.

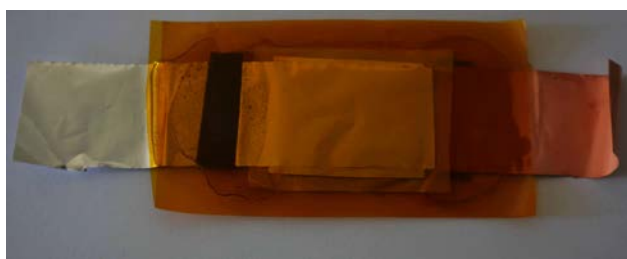

**Figure S5.** Photograph of a flexible full battery based on MoS<sub>2</sub> nanoflake arrays/carbon cloth-liquid electrolyte-LiCoO<sub>2</sub> full battery.
